# Supplementary material for: Walking and hypertension: greater reductions in subjects with higher baseline systolic blood pressure following six months of guided walking
Source: PeerJ. 2018 Aug 30;6:e5471. doi: 10.7717/peerj.5471 (PMC6119598; doi:10.7717/peerj.5471)
Supplement: Supplemental Information 1 [file peerj-06-5471-s001.xlsx]

## Sheet: >120 mmHg
Subject	Età	Sesso	Altezza	Peso_T0	BMI_T0	CV_T0	PS_T0	PD_T0	Vel_m._T0	Peso_T6	BMI_T6	CV_T6	PS_T6	PD_T6	Vel_m._T6	D_Ps	D_PD	D_Vel	D_PESO	D_BMI	D_CV	TERAPIA T0 PA	TERAPIA COL T0	TERAPIA DIABETE T0	TERAPIA CARDIO T0	FUMO
1	75	0	180	85.4	26.358	101	160	80	5.1	81	25	100	160	80	5.5	0	0	0.4	-4.4	-1.35802	-1	1	0	0	0
2	61	1	163	70.5	26.5347	96	125	80	5.2	68	25.5937	94	115	60	5.8	-10	-20	0.6	-2.5	-0.940946	-2	0	0	0	0
3	58	1	155	55.6	23.1426	79	130	70	6	55	22.8928	77	120	80	6	-10	10	0	-0.6	-0.24974	-2	0	0	0	0
4	63	1	155	73.3	30.5099	99.5	160	90	4.4	70.1	29.1779	95	145	85	5.2	-15	-5	0.8	-3.2	-1.33195	-4.5	0	0	0	1
5	62	0	167	65.3	23.4142	93.5	130	80	6.2	65.5	23.486	93	125	75	6.5	-5	-5	0.3	0.2	0.0717129	-0.5	2	0	0	0
6	74	0	167	68	24.3824	99	135	85	3.8	63	22.5896	92	130	85	4.9	-5	0	1.1	-5	-1.79282	-7	1	0	0	1
7	67	0	172	73	24.6755	90.5	135	70	6	71.6	24.2023	90	125	80	8.4	-10	10	2.4	-1.4	-0.473229	-0.5	1	0	0	0
8	56	1	172	82.6	27.9205	101	120	80	6.1	79.7	26.9402	99	120	75	6.4	0	-5	0.3	-2.9	-0.98026	-2	0	0	0	0
9	59	1	145	57.1	27.1581	79	155	78	4.8	56	26.635	77	140	80	5	-15	2	0.2	-1.1	-0.523187	-2	0	0	0	0
10	61	1	145	56.5	26.8728	85	134	77	5.29	57.5	27.3484	83	111	54	5.6	-23	-23	0.31	1	0.475624	-2	0	0	0	0
11	47	1	160	50	19.5312	72	130	80	6.3	50.1	19.5703	70	125	70	6.8	-5	-10	0.5	0.1	0.0390625	-2	0	1	0	0
12	62	1	167	57.2	20.5099	81	122	79	6	57.5	20.6174	79	115	78	6.4	-7	-1	0.4	0.3	0.107569	-2	0	0	0	0
13	74	0	172	70	23.6614	95.5	145	75	6	70	23.6614	95	135	85	6.8	-10	10	0.8	0	0	-0.5	1	1	0	0
14	51	1	177	56.8	18.1302	72	120	80	6.5	57	18.194	72	115	80	6.9	-5	0	0.4	0.2	0.0638386	0	0	0	0	0
15	76	0	170	97.9	33.8754	126	133	75	5.9	92	31.8339	114	125	85	6.3	-8	10	0.4	-5.9	-2.04152	-12	0	0	0	0
16	76	0	173	70.8	23.656	98	135	65	5	69	23.0546	98	130	80	6.4	-5	15	1.4	-1.8	-0.601423	0	1	0	1	1
17	52	1	155	51.5	21.436	79	125	80	6.4	50.3	20.9365	76	120	80	6.9	-5	0	0.5	-1.2	-0.49948	-3	0	0	0	0
18	65	1	160	64.5	25.1953	84.5	130	80	5	62	24.2188	81	120	75	6	-10	-5	1	-2.5	-0.976562	-3.5	1	0	0	0
19	51	1	159	57.1	22.5861	80	130	68	6.5	53.5	21.1621	74	120	75	8.5	-10	7	2	-3.6	-1.42399	-6	0	0	0	0
20	59	1	160	51.9	20.2734	73	120	85	5.6	51.4	20.0781	73	115	70	6	-5	-15	0.4	-0.5	-0.195312	0	0	0	0	0
21	57	1	162	65.4	24.92	85	130	80	5	65.1	24.8057	83	130	75	6	0	-5	1	-0.3	-0.114312	-2	0	0	0	0
22	59	1	160	53.7	20.9766	80.5	130	75	5.3	54	21.0938	79	125	70	6	-5	-5	0.7	0.3	0.117188	-1.5	0	0	0	0
23	61	0	175	94.3	30.7918	108	160	95	6.5	91	29.7143	103	140	85	7	-20	-10	0.5	-3.3	-1.07755	-5	1	0	0	0
24	74	1	160	66	25.7812	95	160	80	5.3	64.8	25.3125	94	145	80	5.8	-15	0	0.5	-1.2	-0.46875	-1	2	0	1	1
25	58	1	164	93	34.5776	111	133	62	4.7	88.4	32.8673	107	130	75	5.2	-3	13	0.5	-4.6	-1.71029	-4	0	0	1	0
26	53	1	147	64	29.6173	95.5	130	80	5.7	62	28.6917	93	125	80	5.7	-5	0	0	-2	-0.92554	-2.5	1	0	0	0
27	58	1	166	105	38.1042	120	135	85	5.1	101	36.6526	111	130	75	5.5	-5	-10	0.4	-4	-1.45159	-9	0	0	0	0
28	66	1	160	70.2	27.4219	89.5	135	85	6.1	68.7	26.8359	88	125	80	6.5	-10	-5	0.4	-1.5	-0.585938	-1.5	1	0	0	0
29	65	1	162	88.3	33.6458	106	140	80	5	84.6	32.2359	101	130	85	5.5	-10	5	0.5	-3.7	-1.40985	-5	0	0	0	0
30	73	1	167	75	26.8923	101	128	75	4.5	74	26.5338	100	125	70	6.2	-3	-5	1.7	-1	-0.358564	-1	0	0	0	0
31	67	1	168	66	23.3844	89	138	69	4.8	63	22.3214	85	130	75	5.7	-8	6	0.9	-3	-1.06293	-4	1	0	0	0	1
32	65	1	159	55.5	21.9532	83.5	155	85	5.6	54.5	21.5577	81	130	80	6	-25	-5	0.4	-1	-0.395554	-2.5	0	0	0	0
33	75	1	170	81	28.0277	95	140	75	5.1	79.4	27.474	95	130	75	5.8	-10	0	0.7	-1.6	-0.553633	0	0	0	0	0
34	64	0	173	70.9	23.6894	90	130	75	6.3	74.2	24.792	92	135	70	6.5	5	-5	0.2	3.3	1.10261	2	0	0	0	0
35	75	0	173	77	25.7276	102	125	80	5.4	75	25.0593	98	120	80	6.9	-5	0	1.5	-2	-0.668248	-4	0	0	0	1
36	53	1	162	62	23.6244	83.5	130	80	5.9	62.3	23.7388	83	125	80	6.3	-5	0	0.4	0.3	0.114312	-0.5	0	0	0	0
37	58	1	160	65.8	25.7031	95	140	80	5.8	65	25.3906	95	130	75	6.5	-10	-5	0.7	-0.8	-0.3125	0	0	0	0	0
38	66	0	170	82.3	28.4775	96.5	150	100	6	79	27.3356	91	140	85	7.1	-10	-15	1.1	-3.3	-1.14187	-5.5	1	0	0	0
39	66	1	160	64.6	25.2344	82	130	80	5.4	62	24.2188	80	110	55	6.1	-20	-25	0.7	-2.6	-1.01562	-2	0	0	0	0
40	74	0	170	76	26.2976	93	145	70	5	75	25.9516	93	120	75	7.2	-25	5	2.2	-1	-0.346021	0	0	0	1	0
41	67	0	165	72.6	26.6667	95	130	75	7.38	71.9	26.4096	90.5	130	60	7.3	0	-15	-0.08	-0.7	-0.257117	-4.5	1	0	0	1
42	59	1	155	55.4	23.0593	73	140	60	6	56.3	23.4339	73	130	80	6.7	-10	20	0.7	0.9	0.37461	0	0	0	0	0
43	60	1	155	57.4	23.8918	79	130	60	6.72	58.5	24.3496	81	125	60	6.8	-5	0	0.08	1.1	0.457856	2	0	0	0	0
44	80	0	173	94.5	31.5747	116	150	75	4.9	93	31.0735	116	145	80	5	-5	5	0.1	-1.5	-0.501186	0	1	1	0	1
45	71	1	150	56.7	25.2	93	159	90	5.8	54	24	90	140	85	6.2	-19	-5	0.4	-2.7	-1.2	-3	0	1	0	0
46	68	0	170	67.7	23.4256	89	128	73	5.8	67	23.1834	89	125	75	6.3	-3	2	0.5	-0.7	-0.242215	0	0	1	0	0
47	54	1	165	67	24.6097	80.5	126	77	5.3	67.3	24.7199	80	120	70	6.3	-6	-7	1	0.3	0.110193	-0.5	0	0	0	0
48	65	1	156	80.9	33.2429	107	140	80	5.6	78.1	32.0924	105	135	70	6	-5	-10	0.4	-2.8	-1.15056	-2	2	0	0	0
49	62	0	167	81.5	29.223	100	120	80	5.9	78	27.968	95	120	75	6.8	0	-5	0.9	-3.5	-1.25498	-5	1	2	0	0
50	58	1	164	55.5	20.635	72.5	120	65	5	55	20.4491	72	115	58	5.6	-5	-7	0.6	-0.5	-0.185901	-0.5	0	0	0	0
51	56	0	175	107.2	35.0041	110	150	85	5.5	105	34.2857	108	145	85	6	-5	0	0.5	-2.2	-0.718367	-2	0	0	0	0
52	62	1	159	68.9	27.2537	101	130	78	5.8	64.2	25.3946	96	120	65	6.1	-10	-13	0.3	-4.7	-1.8591	-5	0	1	0	0
53	71	0	170	80.6	27.8893	106	150	80	5	74	25.6055	101	125	80	6.5	-25	0	1.5	-6.6	-2.28374	-5	0	1	0	3
54	64	0	191	126	34.5385	143	150	100	5	115	31.5233	134	145	90	5.7	-5	-10	0.7	-11	-3.01527	-9	0	0	1	1
55	63	1	152	72.5	31.3798	86	130	78	5.1	71.3	30.8605	84	125	80	5.6	-5	2	0.5	-1.2	-0.519391	-2	0	0	0	0
56	61	1	163	71.3	26.8358	100	135	80	4.5	70	26.3465	93	120	75	5.8	-15	-5	1.3	-1.3	-0.489292	-7	2	0	0	0
57	57	1	165	67.2	24.6832	79.5	130	70	5.5	64.2	23.5813	78	125	75	6.1	-5	5	0.6	-3	-1.10193	-1.5	0	0	0	1
58	67	0	168	74	26.2188	103	160	80	5	70.2	24.8724	100	145	85	6.3	-15	5	1.3	-3.8	-1.34637	-3	2	1	1	1
59	75	0	170	76.2	26.3668	99	155	85	6.3	72	24.9135	89	140	80	6.7	-15	-5	0.4	-4.2	-1.45329	-10	0	0	0	0
60	73	0	165	78	28.6501	112	130	51	4.6	77	28.2828	110	125	85	5.2	-5	34	0.6	-1	-0.367309	-2	1	0	1	0
61	68	0	179	86.8	27.0903	110	150	88	6	90.1	28.1202	110	145	85	6.4	-5	-3	0.4	3.3	1.02993	0	0	1	0	0
62	74	1	150	54.8	24.3556	73	150	85	6.2	55.6	24.7111	71	140	80	6.2	-10	-5	0	0.8	0.355556	-2	0	0	0	0
63	65	1	168	106	37.5567	112	150	80	5	100.8	35.7143	110	145	75	5.6	-5	-5	0.6	-5.2	-1.8424	-2	0	1	1	0
64	74	0	176	84	27.1178	105	120	70	5.1	82.8	26.7304	101	120	75	6	0	5	0.9	-1.2	-0.387397	-4	0	0	0	5
65	61	1	152	48	20.7756	79	125	75	5.6	46.7	20.213	67	125	75	6.2	0	0	0.6	-1.3	-0.562673	-12	1	0	0	0
66	54	1	160	61	23.8281	86	120	77	5.3	60.3	23.5547	86	120	75	6.4	0	-2	1.1	-0.7	-0.273438	0	2	0	0	0
67	69	1	150	69	30.6667	99.5	180	80	4.1	67.2	29.8667	97	155	85	5	-25	5	0.9	-1.8	-0.8	-2.5	0	1	0	0
68	58	1	160	52.7	20.5859	77	165	90	6	53	20.7031	77	150	80	6.5	-15	-10	0.5	0.3	0.117188	0	2	0	0	0
69	53	1	160	65	25.3906	93	120	80	5.5	63	24.6094	91	115	75	7.1	-5	-5	1.6	-2	-0.78125	-2	1	0	0	0
70	63	0	168	78	27.6361	97	155	95	7.2	75.3	26.6794	91	140	80	7.4	-15	-15	0.2	-2.7	-0.956633	-6	0	0	0	0
71	62	1	155	48	19.9792	78	135	80	6.96	46.6	19.3965	75.5	120	80	7.2	-15	0	0.24	-1.4	-0.582726	-2.5	0	0	0	0
72	62	0	170	74.6	25.8131	102	130	75	5.5	70.7	24.4637	94	120	65	6.7	-10	-10	1.2	-3.9	-1.34948	-8	0	0	1	0
73	77	0	177	82.5	26.3334	100	140	80	6.3	78.2	24.9609	95	130	75	6.5	-10	-5	0.2	-4.3	-1.37253	-5	1	0	0	0
74	59	1	160	76.2	29.7656	99	120	70	5.3	76	29.6875	98	120	75	5.9	0	5	0.6	-0.2	-0.078125	-1	0	0	0	0
75	63	0	170	90	31.1419	103	165	90	6	85.3	29.5156	97	130	80	7.6	-35	-10	1.6	-4.7	-1.6263	-6	1	0	0	0
76	66	0	170	81.1	28.0623	101.5	129	92	5	80	27.6817	99	125	85	6.1	-4	-7	1.1	-1.1	-0.380623	-2.5	1	0	1	0
77	66	1	155	55.3	23.0177	82	165	75	5.6	54.7	22.768	81	145	80	6.5	-20	5	0.9	-0.6	-0.24974	-1	0	0	0	0
78	43	0	182	79.3	23.9403	97	160	100	6.1	79.1	23.88	96	150	85	6.8	-10	-15	0.7	-0.2	-0.0603792	-1	1	0	3	0
79	36	1	160	57.7	22.5391	70.5	130	75	6.5	55.8	21.7969	69	125	70	7.8	-5	-5	1.3	-1.9	-0.742188	-1.5	0	0	0	0
80	47	0	178	95.8	30.2361	106	140	80	6	93.5	29.5102	104	135	80	6.7	-5	0	0.7	-2.3	-0.725918	-2	0	0	0	0
81	64	1	155	52.4	21.8106	73.5	130	70	6.9	51.9	21.6025	73	125	70	7.6	-5	0	0.7	-0.5	-0.208117	-0.5	0	0	0	0
82	69	0	167	71.1	25.4939	100	150	80	4.5	70.2	25.1712	99	145	85	5	-5	5	0.5	-0.9	-0.322708	-1	0	0	0	0
83	72	0	170	103.7	35.8824	125	150	80	5.2	100.7	34.8443	120	140	80	5.7	-10	0	0.5	-3	-1.03806	-5	1	0	0	0
84	57	0	183	92	27.4717	103	143	89	5.8	92.1	27.5016	101	140	80	6.1	-3	-9	0.3	0.1	0.0298606	-2	0	0	0	0
85	74	1	159	64.8	25.6319	84.5	145	80	4.9	65.3	25.8297	85	135	70	6	-10	-10	1.1	0.5	0.197777	0.5	0	0	0	0
86	75	0	165	60.2	22.112	85.5	156	67	5.3	60.2	22.112	85.5	145	85	5.7	-11	18	0.4	0	0	0	1	1	0	0
87	48	1	168	88.2	31.25	101	120	80	4.5	87	30.8248	99	120	75	5.5	0	-5	1	-1.2	-0.42517	-2	0	0	0	0
88	72	0	183	90.3	26.9641	105	165	75	5	87	25.9787	101	135	75	7.1	-30	0	2.1	-3.3	-0.985398	-4	1	0	0	1
89	75	1	159	63	24.9199	94	160	75	6.3	63.2	24.999	94	155	65	6.5	-5	-10	0.2	0.2	0.0791108	0	1	1	0	0
90	71	1	162	81.7	31.1309	103	130	75	4.2	82.8	31.5501	103	130	85	5.5	0	10	1.3	1.1	0.419143	0	0	0	0	0
91	56	0	185	92	26.8809	104	130	80	6	86.5	25.2739	100	125	80	8	-5	0	2	-5.5	-1.60701	-4	0	0	0	0
92	62	0	169	94.8	33.1921	108	140	85	6	91.2	31.9317	105	140	75	6.7	0	-10	0.7	-3.6	-1.26046	-3	2	0	0	0
93	50	0	185	97.6	28.5172	107	140	90	6	91.3	26.6764	102	140	80	7.6	0	-10	1.6	-6.3	-1.84076	-5	1	1	0	1
94	67	0	172	75.7	25.5882	101	140	70	4.8	75.8	25.622	101	135	75	5.2	-5	5	0.4	0.1	0.0338021	0	0	0	0	0
95	36	0	175	84.2	27.4939	100.5	120	70	4.8	85	27.7551	100	120	70	5.2	0	0	0.4	0.8	0.261224	-0.5	0	0	0	0
96	66	1	150	83.7	37.2	119	155	80	3.5	82	36.4444	117	150	75	4.1	-5	-5	0.6	-1.7	-0.755556	-2	2	1	1	1
97	63	0	173	100	33.4124	111	141	80	5.5	98	32.7442	108	140	75	5.9	-1	-5	0.4	-2	-0.668248	-3	0	0	0	0
98	50	0	172	84	28.3937	109	130	85	6.2	83	28.0557	106	125	75	6	-5	-10	-0.2	-1	-0.338021	-3	0	0	0	0
99	67	0	183	93	27.7703	107	160	94	6	88	26.2773	102	140	85	6.8	-20	-9	0.8	-5	-1.49303	-5	1	0	0	0
100	68	0	183	89.6	26.7551	102	145	90	7.36	90	26.8745	100	122	79	7.5	-23	-11	0.14	0.4	0.119442	-2	1	0	0	0
101	73	1	154	72.3	30.4857	98.7	150	78	4.7	71.3	30.0641	95	145	75	5.6	-5	-3	0.9	-1	-0.421656	-3.7	0	0	0	0
102	47	1	168	65.9	23.3489	87	120	80	6	66	23.3844	85	120	75	6.7	0	-5	0.7	0.1	0.0354308	-2	0	0	0	0
103	71	1	168	84.6	29.9745	103.5	145	80	5	83.1	29.443	101	135	80	5.8	-10	0	0.8	-1.5	-0.531463	-2.5	1	0	0	0
104	62	1	155	65.7	27.3465	94.5	140	70	4.7	67	27.8876	95	145	70	5.6	5	0	0.9	1.3	0.541103	0.5	1	0	0	1
105	63	1	154	67.7	28.5461	95	135	75	5.39	64.7	27.2812	92	130	60	5.6	-5	-15	0.21	-3	-1.26497	-3	1	0	0	1
106	46	0	170	77.1	26.6782	93.5	140	80	6.1	74	25.6055	91	135	80	6.5	-5	0	0.4	-3.1	-1.07266	-2.5	0	1	0	0
107	64	0	183	113	33.7424	129	140	100	5.5	98.8	29.5022	119	140	85	6.2	0	-15	0.7	-14.2	-4.2402	-10	0	1	0	2
108	63	1	158	63.3	25.3565	85	135	80	4.8	61	24.4352	81	130	75	6.7	-5	-5	1.9	-2.3	-0.921327	-4	0	1	0	0
109	52	1	170	89.7	31.0381	104	125	70	5.4	82.3	28.4775	100	125	70	6.1	0	0	0.7	-7.4	-2.56055	-4	0	0	0	0
110	73	0	175	87.1	28.4408	104	140	85	6	78.6	25.6653	100	135	70	6.3	-5	-15	0.3	-8.5	-2.77551	-4	2	1	0	0
111	61	1	154	57.5	24.2452	86	140	65	5.5	56.4	23.7814	84	140	60	6.3	0	-5	0.8	-1.1	-0.463822	-2	2	1	0	0
112	59	1	159	88.2	34.8879	112	147	80	5.3	86.7	34.2945	109	135	80	5.6	-12	0	0.3	-1.5	-0.593331	-3	1	0	1	0
113	60	0	180	93.7	28.9198	104	148	80	6.4	91	28.0864	102	145	80	6.8	-3	0	0.4	-2.7	-0.833333	-2	0	0	0	0
114	74	1	153	48	20.5049	71	145	70	6.2	47	20.0777	70	140	75	6.7	-5	5	0.5	-1	-0.427186	-1	1	0	0	1
115	63	0	178	83	26.1962	108	120	85	6.5	83	26.1962	105	120	80	7	0	-5	0.5	0	0	-3	0	0	0	0
116	63	1	160	72.1	28.1641	85.5	127	84	5.2	70.2	27.4219	83	125	80	6	-2	-4	0.8	-1.9	-0.742187	-2.5	0	0	0	0
117	49	1	167	76.2	27.3226	86	145	90	6.1	74	26.5338	83	140	80	7.2	-5	-10	1.1	-2.2	-0.788841	-3	0	0	0	0
118	74	1	168	90	31.8878	108	145	65	5	92	32.5964	108	130	70	5.2	-15	5	0.2	2	0.708617	0	1	0	0	0
119	66	1	174	81.2	26.8199	103	140	60	5.6	80.3	26.5227	101	135	75	6.2	-5	15	0.6	-0.9	-0.297265	-2	0	0	0	0
120	72	0	169	82	28.7105	107	130	65	7.2	83.2	29.1306	106	140	85	6.8	10	20	-0.4	1.2	0.420153	-1	0	0	0	0
121	68	0	175	90	29.3878	107.5	130	70	5	91.1	29.7469	107	130	75	5.8	0	5	0.8	1.1	0.359184	-0.5	1	1	0	1
122	44	1	153	52.6	22.47	76	140	72	5.6	51	21.7865	74	135	70	7.6	-5	-2	2	-1.6	-0.683498	-2	0	0	0	0
123	60	0	174	80.4	26.5557	99	130	70	6.2	81	26.7539	98	130	75	6.4	0	5	0.2	0.6	0.198177	-1	0	1	0	0
124	66	0	170	89	30.7958	103	140	80	6.3	88	30.4498	103	135	75	6.5	-5	-5	0.2	-1	-0.346021	0	2	0	0	0
125	60	1	168	74.6	26.4314	99.5	130	80	5.9	75	26.5731	99	125	75	6.3	-5	-5	0.4	0.4	0.141723	-0.5	0	1	0	0
126	73	0	173	66.8	22.3195	88	120	75	6.4	65.5	21.8851	87	120	75	6.7	0	0	0.3	-1.3	-0.434361	-1	0	0	0	0
127	74	0	180	85	26.2346	106	140	68	6.63	83.2	25.679	103	125	70	7	-15	2	0.37	-1.8	-0.555556	-3	1	1	1	0
128	71	0	170	84	29.0657	107	135	75	5.5	84	29.0657	105	130	70	6	-5	-5	0.5	0	0	-2	1	1	0	0
129	65	0	176	87.3	28.1831	106.5	135	100	6	84.8	27.376	102	130	80	6.5	-5	-20	0.5	-2.5	-0.807076	-4.5	0	0	0	0
130	52	1	177	98.9	31.5682	103	126	79	6	96.3	30.7383	101	120	71	6.8	-6	-8	0.8	-2.6	-0.829902	-2	0	0	0	0
131	66	1	150	68.9	30.6222	92	135	70	4.6	65.3	29.0222	90	130	70	5.8	-5	0	1.2	-3.6	-1.6	-2	1	0	0	0
132	62	1	160	54	21.0938	71	125	70	7.16	52	20.3125	71	98	72	7.5	-27	2	0.34	-2	-0.78125	0	0	0	0	0
133	65	1	143	53.4	26.1137	88	130	70	4.8	53	25.9181	86	125	70	5.2	-5	0	0.4	-0.4	-0.195609	-2	1	1	0	1
134	57	1	160	79.3	30.9766	99	130	80	5.7	78.4	30.625	97	125	80	6	-5	0	0.3	-0.9	-0.351562	-2	1	0	0	0
135	60	1	160	56	21.875	82	120	80	5.3	56.3	21.9922	82	120	75	6.3	0	-5	1	0.3	0.117187	0	0	0	0	0
136	54	0	180	78.4	24.1975	97.5	145	90	6.8	79	24.3827	97	140	85	6.8	-5	-5	0	0.6	0.185185	-0.5	1	0	0	0
137	63	1	154	47.7	20.113	71	125	80	6.5	46.3	19.5227	68	125	60	6.5	0	-20	0	-1.4	-0.590319	-3	0	0	0	0
138	74	0	180	91.4	28.2099	110	130	75	5	91	28.0864	112	130	75	6.2	0	0	1.2	-0.4	-0.123457	2	0	0	0	0
139	60	1	157	69.2	28.0742	86	124	69	6	69	27.993	85	120	70	6.4	-4	1	0.4	-0.2	-0.0811392	-1	0	0	0	0
140	70	1	167	80.6	28.9003	98	145	85	5	82	29.4023	98	140	80	5.5	-5	-5	0.5	1.4	0.50199	0	1	0	0	0
141	66	0	178	78	24.6181	94	145	80	6.47	77.3	24.3972	93	145	80	6.7	0	0	0.23	-0.7	-0.220932	-1	0	0	0	0
142	61	1	170	65.4	22.6298	90	120	70	5.5	67.1	23.218	90	120	75	5.9	0	5	0.4	1.7	0.588235	0	0	0	0	0
143	72	1	160	74.1	28.9453	93	143	78	4.7	66	25.7812	88	140	75	5.4	-3	-3	0.7	-8.1	-3.16406	-5	1	0	0	0
144	58	0	177	93.9	29.9722	107	135	90	6	91.3	29.1423	107	130	90	6	-5	0	0	-2.6	-0.829902	0	1	1	0	0
145	63	0	171	113	38.6444	129.5	165	90	6	102.7	35.1219	114	150	85	6.5	-15	-5	0.5	-10.3	-3.52245	-15.5	0	0	0	0
146	71	0	173	73	24.3911	91	140	90	5	73	24.3911	90	135	80	6	-5	-10	1	0	0	-1	0	0	0	0
147	60	0	167	73.6	26.3903	102	168	98	6.5	70.5	25.2788	99	140	80	7.1	-28	-18	0.6	-3.1	-1.11155	-3	0	1	0	0
148	75	0	158	69.6	27.8801	99	160	90	4.2	69.4	27.8	95	130	80	5.7	-30	-10	1.5	-0.2	-0.0801154	-4	0	0	0	0
149	34	1	152	58.4	25.277	75	125	75	4.3	57.2	24.7576	73	120	70	6.1	-5	-5	1.8	-1.2	-0.519391	-2	0	0	0	0
150	60	1	162	68.7	26.1774	99	135	90	4.5	69	26.2917	97	130	75	6.7	-5	-15	2.2	0.3	0.114312	-2	0	1	0	0
151	67	1	148	83	37.8926	114	140	75	4.3	71.2	32.5055	102	120	75	5.5	-20	0	1.2	-11.8	-5.38714	-12	3	0	0	0
152	67	0	172	85.2	28.7994	110.5	130	75	5.7	76.2	25.7572	101	130	80	6.7	0	5	1	-9	-3.04218	-9.5	1	0	0	0
153	62	1	164	62.4	23.2005	81.5	150	90	5.2	62	23.0518	81	140	80	6.3	-10	-10	1.1	-0.4	-0.148721	-0.5	0	0	0	0
154	73	1	163	69	25.9701	84	120	70	5.4	67.8	25.5185	82	120	75	6.2	0	5	0.8	-1.2	-0.451654	-2	2	1	0	1
155	63	0	179	85.8	26.7782	99	138	96	5.5	81	25.2801	96	125	80	6.3	-13	-16	0.8	-4.8	-1.49808	-3	1	0	1	0
156	61	1	166	63	22.8625	82.5	120	80	5.5	61.5	22.3182	79	115	75	6.8	-5	-5	1.3	-1.5	-0.544346	-3.5	1	0	0	0
157	62	1	160	78.2	30.5469	98	145	75	5.1	79	30.8594	99	140	70	5.5	-5	-5	0.4	0.8	0.3125	1	0	0	0	0
158	73	0	171	68.5	23.426	90	128	70	5	66.3	22.6736	87	125	70	6.3	-3	0	1.3	-2.2	-0.752368	-3	1	0	0	1
159	63	1	150	81.3	36.1333	114	150	90	4.4	84	37.3333	114	140	85	4.5	-10	-5	0.1	2.7	1.2	0	1	0	0	0
160	63	1	163	71.4	26.8734	90.5	140	75	5.1	69.2	26.0454	88	125	80	6.2	-15	5	1.1	-2.2	-0.828033	-2.5	0	0	0	0
161	69	0	167	65	23.3067	89	125	80	5.8	64	22.9481	89	125	80	6.5	0	0	0.7	-1	-0.358564	0	2	0	0	0
162	79	0	174	91.4	30.1889	113	180	85	4.6	89	29.3962	110	150	85	5.7	-30	0	1.1	-2.4	-0.792707	-3	1	0	0	0
163	63	1	165	83.3	30.5969	98.5	135	85	5.1	83.1	30.5234	98	130	80	6.3	-5	-5	1.2	-0.2	-0.0734619	-0.5	1	0	0	0
164	72	1	158	55.5	22.232	80	155	70	5	56.4	22.5925	80	125	50	6.2	-30	-20	1.2	0.9	0.360519	0	0	1	0	0
165	42	1	153	75.5	32.2526	101	120	70	6.6	72	30.7574	97	120	75	6.9	0	5	0.3	-3.5	-1.49515	-4	0	0	0	0
166	62	1	168	69.3	24.5536	97	135	80	6.5	68	24.093	94	135	80	6.6	0	0	0.1	-1.3	-0.460601	-3	0	1	0	0
167	66	1	160	73.3	28.6328	95	120	80	5.5	73.1	28.5547	95	115	75	6.3	-5	-5	0.8	-0.2	-0.078125	0	0	1	0	0
168	66	1	160	65	25.3906	87.5	140	80	5.8	61.2	23.9062	83	135	75	6.5	-5	-5	0.7	-3.8	-1.48438	-4.5	1	1	0	0
169	65	1	172	57.2	19.3348	76	120	75	6	55.7	18.8277	75.5	109	63	7	-11	-12	1	-1.5	-0.507031	-0.5	1	0	0	1
170	53	1	166	84.5	30.6648	102	135	85	5.7	81.3	29.5036	99	125	80	6.6	-10	-5	0.9	-3.2	-1.16127	-3	0	0	0	0
171	72	0	160	59.3	23.1641	94	145	70	5.5	59	23.0469	94	140	80	6	-5	10	0.5	-0.3	-0.117188	0	0	0	0	0
172	51	1	160	69.6	27.1875	98	145	80	5.7	68	26.5625	96	135	75	6.7	-10	-5	1	-1.6	-0.625	-2	0	0	0	0
173	69	0	165	77	28.2828	98	155	82	5	80.6	29.6051	99	150	80	5.5	-5	-2	0.5	3.6	1.32231	1	0	0	0	0
174	64	0	180	75.7	23.3642	94	158	78	6	76	23.4568	92	140	80	6.8	-18	2	0.8	0.3	0.0925926	-2	2	0	0	0
175	52	0	175	76	24.8163	99	130	80	5.4	67.8	22.1388	93	130	75	7	0	-5	1.6	-8.2	-2.67755	-6	0	0	0	0
176	75	1	157	60.7	24.6257	88	140	65	4.8	61	24.7475	87	135	70	5.7	-5	5	0.9	0.3	0.121709	-1	0	0	0	0
177	78	1	165	77.5	28.4665	96	145	70	5.29	77	28.2828	96	138	65	5.3	-7	-5	0.01	-0.5	-0.183655	0	0	1	0	1
178	73	1	158	63.3	25.3565	100	135	65	4.8	60.3	24.1548	97	125	70	6	-10	5	1.2	-3	-1.20173	-3	1	0	0	0
179	73	1	159	69	27.2932	95	160	80	5.1	65.5	25.9088	89	135	80	5.6	-25	0	0.5	-3.5	-1.38444	-6	0	0	0	0
180	62	1	160	67.4	26.3281	81.5	120	75	4.8	66.1	25.8203	80	120	70	6.2	0	-5	1.4	-1.3	-0.507813	-1.5	0	0	0	0
181	56	0	170	78	26.9896	98	188	100	5.8	77.3	26.7474	96	150	80	6.2	-38	-20	0.4	-0.7	-0.242215	-2	1	1	0	0
182	64	1	160	83.2	32.5	97	130	70	5.4	77	30.0781	91	125	70	6.3	-5	0	0.9	-6.2	-2.42188	-6	0	0	0	0
183	74	1	155	65.6	27.3049	91	150	80	6	64.2	26.7222	90	140	80	6.2	-10	0	0.2	-1.4	-0.582726	-1	1	1	0	0
184	63	1	165	70	25.7117	92.5	125	75	6.5	69.4	25.4913	92	120	75	6.8	-5	0	0.3	-0.6	-0.220386	-0.5	0	1	0	0
185	52	0	170	85.4	29.5502	105	126	70	5.1	82	28.3737	102	120	80	6.5	-6	10	1.4	-3.4	-1.17647	-3	1	0	0	0
186	67	0	172	82.9	28.0219	102	130	80	7.1	80.7	27.2783	100.5	140	80	7.1	10	0	0	-2.2	-0.743645	-1.5	0	1	0	1
187	53	1	153	68	29.0487	88	130	80	5	64.5	27.5535	86	125	80	5.9	-5	0	0.9	-3.5	-1.49515	-2	0	0	0	0
188	76	1	150	66.9	29.7333	87	130	80	4.7	60.3	26.8	83	130	75	5.7	0	-5	1	-6.6	-2.93333	-4	0	0	0	0
189	44	1	160	59.3	23.1641	81	125	75	6.7	59.1	23.0859	80	120	70	7.3	-5	-5	0.6	-0.2	-0.078125	-1	0	0	0	0
190	54	1	165	79	29.0174	94	130	75	6.2	75.3	27.6584	92	130	75	6.8	0	0	0.6	-3.7	-1.35904	-2	0	0	0	0
191	69	0	175	113.2	36.9633	126	145	70	4.2	107	34.9388	122	135	75	5.4	-10	5	1.2	-6.2	-2.02449	-4	3	1	0	0
192	61	0	164	66	24.539	96	140	75	6.2	63.9	23.7582	95	140	80	6.6	0	5	0.4	-2.1	-0.780785	-1	0	1	0	0
193	73	0	178	78.8	24.8706	101.5	120	70	6.9	77.9	24.5865	100	120	65	6.6	0	-5	-0.3	-0.9	-0.284055	-1.5	0	0	0	1
194	48	1	155	61.5	25.5983	88	130	70	5.7	55.8	23.2258	84	120	70	6.3	-10	0	0.6	-5.7	-2.37253	-4	0	0	0	0
195	51	1	170	77.6	26.8512	99	120	70	5.5	75.5	26.1246	92	130	75	6.7	10	5	1.2	-2.1	-0.726644	-7	0	0	0	0
196	68	1	162	60.1	22.9005	78.5	120	63	5	59	22.4813	78	120	70	6.1	0	7	1.1	-1.1	-0.419143	-0.5	0	0	0	0
197	43	1	152	91.7	39.6901	101	130	75	5.9	90.2	39.0409	100	125	70	6.3	-5	-5	0.4	-1.5	-0.649238	-1	0	0	0	0
198	62	1	164	74.8	27.8108	100	120	75	5	75.3	27.9967	100	120	75	6	0	0	1	0.5	0.185901	0	0	0	0	0
199	36	1	170	68	23.5294	88	120	80	6.4	68	23.5294	88	120	75	6.8	0	-5	0.4	0	0	0	0	0	0	0
200	62	0	183	153	45.6866	145	160	90	4.5	140	41.8048	135	145	85	5.3	-15	-5	0.8	-13	-3.88187	-10	2	0	0	0
201	72	1	155	54.5	22.6847	81.5	125	65	4.8	49.7	20.6868	74	120	70	6.4	-5	5	1.6	-4.8	-1.99792	-7.5	0	0	0	0
202	53	1	174	88.5	29.2311	101	140	75	5.73	93.7	30.9486	108	135	80	6	-5	5	0.27	5.2	1.71753	7	2	0	0	1
203	61	1	168	103	36.4938	107	140	70	6.2	100.3	35.5371	105	130	80	6.5	-10	10	0.3	-2.7	-0.956633	-2	0	0	0	0
204	61	0	188	112.1	31.7168	124	140	90	6.3	109.3	30.9246	121	135	85	6.9	-5	-5	0.6	-2.8	-0.792214	-3	1	0	0	0
205	51	0	181	103.7	31.6535	106.5	165	100	6.5	101.3	30.9209	103	145	85	7.3	-20	-15	0.8	-2.4	-0.732578	-3.5	0	0	0	0
206	58	1	162	50	19.052	79	125	70	6	50.3	19.1663	77	120	70	6.6	-5	0	0.6	0.3	0.114312	-2	0	0	0	0
207	59	1	160	69.2	27.0313	90	140	75	5.6	64	25	85	120	75	6.9	-20	0	1.3	-5.2	-2.03125	-5	1	0	0	0
208	75	0	167	90	32.2708	106	130	70	5.7	84.7	30.3704	103	125	75	6.4	-5	5	0.7	-5.3	-1.90039	-3	1	0	0	0
209	74	1	166	78	28.306	108	140	90	6.06	78.9	28.6326	107.5	146	81	6	6	-9	-0.06	0.9	0.326608	-0.5	1	1	0	0
210	48	1	164	78.6	29.2237	97.5	130	86	5	75	27.8852	91	130	75	6.4	0	-11	1.4	-3.6	-1.33849	-6.5	0	0	0	0
211	61	1	159	59.7	23.6146	90.5	120	73	4.6	63	24.9199	91	120	70	5.5	0	-3	0.9	3.3	1.30533	0.5	0	0	0	0
212	52	1	157	65	26.3702	78	135	85	6.3	63.2	25.64	74	125	75	7.1	-10	-10	0.8	-1.8	-0.730253	-4	0	0	0	0
213	64	0	176	95	30.6689	114	130	70	6.3	89.4	28.8611	104	130	70	7	0	0	0.7	-5.6	-1.80785	-10	0	0	0	0
214	59	1	170	68.7	23.7716	89	130	70	6.1	68.5	23.7024	85	125	70	6.8	-5	0	0.7	-0.2	-0.0692042	-4	0	0	0	0
215	78	0	166	63.5	23.044	92	160	90	6	61	22.1367	89	140	80	6	-20	-10	0	-2.5	-0.907243	-3	1	1	1	1
216	58	1	175	76.4	24.9469	91	140	85	5.1	76.2	24.8816	87	130	80	6	-10	-5	0.9	-0.2	-0.0653061	-4	0	0	0	0
217	58	0	170	89.5	30.9689	104	130	75	5	84.2	29.1349	101	130	70	5.9	0	-5	0.9	-5.3	-1.83391	-3	0	0	0	0
218	69	0	162	102.5	39.0565	128.5	150	60	5.3	91	34.6746	119	140	70	6.2	-10	10	0.9	-11.5	-4.38195	-9.5	0	0	0	0
219	64	1	170	63.5	21.9723	77	140	80	5.3	63.9	22.1107	76	140	75	6.2	0	-5	0.9	0.4	0.138408	-1	0	0	0	0
220	72	1	165	74.5	27.3646	98	130	70	4.6	69.4	25.4913	90	125	70	6	-5	0	1.4	-5.1	-1.87328	-8	0	0	0	0
221	62	1	158	63	25.2363	85	125	90	6	62	24.8358	82	120	85	6.7	-5	-5	0.7	-1	-0.400577	-3	2	0	0	0
222	58	1	163	72	27.0993	96	125	85	5.7	67.5	25.4055	91	125	80	6.4	0	-5	0.7	-4.5	-1.6937	-5	0	0	0	0
223	66	1	175	115	37.551	125	150	80	4.7	105	34.2857	118	140	80	5.7	-10	0	1	-10	-3.26531	-7	1	1	0	0
224	69	0	188	122.5	34.6593	121	150	77	5.5	116.1	32.8486	114	140	75	6.4	-10	-2	0.9	-6.4	-1.81077	-7	3	0	0	0
225	63	1	157	64.2	26.0457	89	140	70	5	68.4	27.7496	98	130	70	5.5	-10	0	0.5	4.2	1.70392	9	1	0	0	0
226	68	1	161	81.2	31.326	102	140	90	5	76	29.3199	97	135	80	5.5	-5	-10	0.5	-5.2	-2.0061	-5	0	0	0	0
227	45	1	155	85.1	35.4214	102	126	87	6.3	80	33.2986	95	125	80	6	-1	-7	-0.3	-5.1	-2.12279	-7	0	1	0	0
228	65	1	162	83	31.6263	100	124	63	5.5	83.4	31.7787	99	120	60	5.7	-4	-3	0.2	0.4	0.152416	-1	0	0	0	0
229	63	1	151	67.5	29.604	98	134	79	5	65	28.5075	94	125	70	5.8	-9	-9	0.8	-2.5	-1.09644	-4	2	0	1	0
230	61	0	182	111.7	33.7218	121	155	70	5.5	103.2	31.1557	117	145	70	5.8	-10	0	0.3	-8.5	-2.56612	-4	1	0	0	0
231	59	1	169	57.9	20.2724	88.5	125	71	5.5	57.5	20.1323	85	120	70	6.1	-5	-1	0.6	-0.4	-0.140051	-3.5	0	0	0	0
232	69	0	163	64	24.0882	86	155	85	6	63.6	23.9377	84	140	80	6.5	-15	-5	0.5	-0.4	-0.150551	-2	0	0	0	0
233	40	1	163	76	28.6048	97	130	70	5.1	73.2	27.5509	93	125	75	6.7	-5	5	1.6	-2.8	-1.05386	-4	0	0	0	0
234	66	1	160	62.5	24.4141	86	140	75	3	59.5	23.2422	81	130	75	5.8	-10	0	2.8	-3	-1.17188	-5	2	0	0	0
235	71	1	158	59.5	23.8343	81	135	70	5.81	58.3	23.3536	82	110	65	5.4	-25	-5	-0.41	-1.2	-0.480692	1	2	1	0	0
236	63	1	150	74.2	32.9778	102	130	70	5	71	31.5556	102.5	125	75	5.9	-5	5	0.9	-3.2	-1.42222	0.5	0	0	0	0
237	45	1	168	70.9	25.1205	95	140	80	6	70	24.8016	93	125	70	6.5	-15	-10	0.5	-0.9	-0.318878	-2	0	0	0	0
238	66	0	160	74	28.9062	104	135	75	5.5	72.6	28.3594	101	130	70	6.3	-5	-5	0.8	-1.4	-0.546875	-3	0	0	0	0
239	50	1	163	61.3	23.072	76.5	125	69	6.7	59.9	22.5451	78	125	75	7.5	0	6	0.8	-1.4	-0.52693	1.5	1	0	0	0
240	75	0	178	93.7	29.5733	107	125	80	5.5	88.8	28.0268	101	125	75	6.5	0	-5	1	-4.9	-1.54652	-6	0	0	0	0
241	57	1	168	77.3	27.388	94	124	74	5	71.2	25.2268	89	125	70	5.9	1	-4	0.9	-6.1	-2.16128	-5	0	0	0	0
242	65	1	171	77.8	26.6065	96	150	85	5	73.6	25.1701	93	140	80	5.7	-10	-5	0.7	-4.2	-1.43634	-3	1	1	0	0
243	57	1	158	67.5	27.0389	92.5	135	80	7.8	66.2	26.5182	91	130	75	7.6	-5	-5	-0.2	-1.3	-0.52075	-1.5	0	0	0	0
244	63	1	155	57.2	23.8085	86	145	74	5.5	57	23.7253	85	135	70	7	-10	-4	1.5	-0.2	-0.0832466	-1	1	1	0	1
245	56	0	170	74.4	25.7439	94	140	75	5.9	73.7	25.5017	93	130	80	6.5	-10	5	0.6	-0.7	-0.242215	-1	0	0	0	0
246	56	1	163	71	26.7229	95	145	85	6	68.7	25.8572	95	135	75	6.7	-10	-10	0.7	-2.3	-0.865671	0	1	0	0	0
247	44	1	167	65	23.3067	80	120	67	6.5	64	22.9481	78	120	70	7.2	0	3	0.7	-1	-0.358564	-2	0	0	0	0
248	59	1	160	79.3	30.9766	104	135	80	4.9	71.3	27.8516	92	125	75	6	-10	-5	1.1	-8	-3.125	-12	1	0	0	0
249	68	0	180	90	27.7778	115.5	140	90	4.6	80.3	24.784	106	135	80	5.5	-5	-10	0.9	-9.7	-2.99383	-9.5	0	1	0	0
250	54	1	170	98.7	34.1522	123	135	70	4.5	94	32.526	99	125	70	6.9	-10	0	2.4	-4.7	-1.6263	-24	0	0	0	0
251	81	0	184	88.8	26.2287	102	140	70	6.8	90	26.5832	106	125	70	6.8	-15	0	0	1.2	0.354442	4	0	0	0	0
252	78	0	170	86.9	30.0692	114	175	80	5.3	86	29.7578	112	145	80	4.9	-30	0	-0.4	-0.9	-0.311419	-2	1	0	0	1
253	64	1	160	66.9	26.1328	96.5	120	70	6	64.3	25.1172	93	120	75	6.5	0	5	0.5	-2.6	-1.01562	-3.5	0	0	0	0
254	50	1	164	67.7	25.171	90	130	80	6.3	67.3	25.0223	88	130	75	6.8	0	-5	0.5	-0.4	-0.148721	-2	0	1	0	0
255	69	1	160	61.6	24.0625	87	140	55	6	60	23.4375	85	125	75	7	-15	20	1	-1.6	-0.625	-2	0	1	0	0
256	63	1	170	72.6	25.1211	97	140	85	6.3	72.6	25.1211	96	135	80	6.5	-5	-5	0.2	0	0	-1	0	0	0	0
257	70	0	182	91.2	27.5329	106	130	85	5.9	84.7	25.5706	101	125	80	7.1	-5	-5	1.2	-6.5	-1.96232	-5	1	0	0	0
258	46	1	164	63.3	23.5351	82.5	120	75	6.7	62.1	23.0889	81	120	70	7.1	0	-5	0.4	-1.2	-0.446163	-1.5	0	0	0	0
259	61	1	159	65	25.711	85	131	79	5.8	64.3	25.4341	84	130	75	6.7	-1	-4	0.9	-0.7	-0.276888	-1	1	1	0	0
260	63	0	170	101.5	35.1211	113	160	99	6.6	98.5	34.083	112	140	85	7.7	-20	-14	1.1	-3	-1.03806	-1		0	0	0
261	71	0	183	102.6	30.6369	112.5	165	90	6.2	93.8	28.0092	107	145	80	8.4	-20	-10	2.2	-8.8	-2.62773	-5.5	2	0	0	0
262	58	1	168	68.4	24.2347	91.5	135	90	5.9	71	25.1559	92	135	75	6	0	-15	0.1	2.6	0.921202	0.5	0	0	0	0
263	77	0	172	72.1	24.3713	96.5	145	80	5.5	69	23.3234	95	145	80	6.3	0	0	0.8	-3.1	-1.04786	-1.5	1	0	0	0
264	64	0	164	82	30.4878	107	125	85	5.87	75.8	28.1826	106	120	75	6.2	-5	-10	0.33	-6.2	-2.30518	-1	2	1	0	1
265	64	0	171	92.2	31.5311	108	150	85	5.5	84.2	28.7952	105	140	80	6.3	-10	-5	0.8	-8	-2.73588	-3	1	1	0	0
266	64	1	164	82.5	30.6737	104	125	80	5.7	80.6	29.9673	96	120	75	5.9	-5	-5	0.2	-1.9	-0.706425	-8	0	0	0	0
267	61	0	174	78.8	26.0272	92	120	70	6.5	78	25.763	90	120	75	5.9	0	5	-0.6	-0.8	-0.264236	-2	0	0	0	0
268	68	1	163	55.4	20.8514	83	120	70	5.03	55.6	20.9266	76.5	115	70	5.9	-5	0	0.87	0.2	0.0752757	-6.5	0	0	0	0
269	67	1	160	53	20.7031	75	140	80	6.5	53.5	20.8984	75	135	80	6.5	-5	0	0	0.5	0.195312	0	1	1	0	0
270	62	0	174	72.8	24.0454	93	130	78	5.5	69.9	23.0876	71	125	80	7.4	-5	2	1.9	-2.9	-0.957854	-22	0	1	1	0
271	55	0	178	84.4	26.6381	108	150	90	7	86	27.143	107	140	80	6.9	-10	-10	-0.1	1.6	0.504987	-1	0	0	1	0
272	56	1	165	80.4	29.5317	100.5	160	115	6	74.3	27.2911	96	140	85	6.8	-20	-30	0.8	-6.1	-2.24059	-4.5	0	0	0	0
273	62	0	180	98	30.2469	110	150	70	5	95	29.321	107	120	80	6	-30	10	1	-3	-0.925926	-3	2	1	0	2
274	63	0	180	95	29.321	107	120	80	6.03	97.6	30.1235	108	116	70	5.9	-4	-10	-0.13	2.6	0.802469	1	2	1	0	2
275	38	1	158	52.5	21.0303	68.5	125	75	6.5	54	21.6311	68	120	70	7.3	-5	-5	0.8	1.5	0.600865	-0.5	0	0	0	0
276	66	1	159	59.2	23.4168	85	120	60	6	58.6	23.1795	81	120	60	6.9	0	0	0.9	-0.6	-0.237332	-4	0	0	0	0
277	49	1	167	68	24.3824	79	130	70	5	67.3	24.1314	74	125	70	6.2	-5	0	1.2	-0.7	-0.250995	-5	0	0	0	0
278	66	1	158	85	34.049	123	145	90	4.7	80.7	32.3266	118	130	85	5.6	-15	-5	0.9	-4.3	-1.72248	-5	1	0	0	0
279	67	1	158	81	32.4467	116	131	87	5.59	80	32.0461	112	130	80	5.8	-1	-7	0.21	-1	-0.400577	-4	1	0	0	0
280	64	0	170	84.5	29.2388	96	145	90	6.77	86	29.7578	97.5	145	84	7.2	0	-6	0.43	1.5	0.519031	1.5	1	0	0	0
281	74	1	160	66.3	25.8984	88	150	83	5.2	65.3	25.5078	88	140	75	6.1	-10	-8	0.9	-1	-0.390625	0	1	0	0	0
282	63	1	168	73.9	26.1834	93	135	70	5	71.5	25.333	93	130	75	7.1	-5	5	2.1	-2.4	-0.85034	0	0	0	0	0
283	69	0	170	77	26.6436	98.5	160	75	5.2	75.5	26.1246	98	120	70	6.6	-40	-5	1.4	-1.5	-0.519031	-0.5	1	0	0	0
284	59	1	172	110.8	37.4527	116	135	85	5.5	100.7	34.0387	107	125	75	5.9	-10	-10	0.4	-10.1	-3.41401	-9	0	0	0	0
285	62	1	165	75.3	27.6584	93	120	75	6.3	66.3	24.3526	85	120	70	6.9	0	-5	0.6	-9	-3.30579	-8	0	0	0	0
286	65	1	162	68.8	26.2155	94.5	120	65	6.5	63.7	24.2722	91	120	60	7	0	-5	0.5	-5.1	-1.9433	-3.5	0	0	0	0
287	56	1	150	55.7	24.7556	83	130	85	6	53.9	23.9556	77	125	75	7	-5	-10	1	-1.8	-0.8	-6	0	0	0	0
288	58	1	152	53.9	23.3293	77	125	75	6.96	53.8	23.286	77	120	65	7	-5	-10	0.04	-0.1	-0.0432825	0	0	0	0	0
289	68	1	165	62	22.7732	77.5	140	93	5	58.4	21.4509	78	120	70	6.1	-20	-23	1.1	-3.6	-1.32231	0.5	0	0	0	0
290	55	1	164	76	28.257	98	145	80	5.5	68.3	25.3941	92	135	80	6.3	-10	0	0.8	-7.7	-2.86288	-6	1	0	0	0
291	73	0	178	77.6	24.4919	101	125	70	4.6	76.1	24.0184	101	120	75	5.2	-5	5	0.6	-1.5	-0.473425	0	0	0	0	0
292	65	1	165	64.7	23.7649	89	130	75	5.2	64	23.5078	89	125	75	6.1	-5	0	0.9	-0.7	-0.257117	0	0	0	0	0
293	65	0	170	96	33.218	120	130	85	5.9	93.5	32.3529	117	130	80	6.1	0	-5	0.2	-2.5	-0.865052	-3	1	0	0	0
294	69	0	180	98.2	30.3086	109.5	155	80	6	89.7	27.6852	98	145	75	6.6	-10	-5	0.6	-8.5	-2.62346	-11.5	1	0	0	0
295	60	1	170	66	22.8374	99	120	65	4.9	64	22.1453	96	125	75	6.2	5	10	1.3	-2	-0.692042	-3	0	0	0	0
296	59	1	163	83	31.2394	97	128	80	6.2	75.3	28.3413	94	125	75	6.8	-3	-5	0.6	-7.7	-2.89811	-3	0	0	0	0
